# Supplementary material for: A Cu2B2 monolayer with planar hypercoordinate motifs: an efficient catalyst for CO electroreduction to ethanol
Source: Royal Society of Chemistry journal article supplement (doi:10.1039/d0ta02471f), 2020-01-01
Supplement: d0ta02471f1.pdf [file d0ta02471f1.pdf]

Electronic Supplementary Information (ESI)

**Cu<sub>2</sub>B<sub>2</sub> Monolayer with Planar Hypercoordinate Motifs: an Efficient Catalyst for  
CO Electroreduction to Ethanol**

Jingjing Jia,<sup>a</sup> Haijun Zhang,<sup>b,\*</sup> Zhongxu Wang,<sup>c</sup> Jingxiang Zhao,<sup>\*,a</sup> Zhen Zhou<sup>\*,c</sup>

<sup>a</sup> College of Chemistry and Chemical Engineering, and Key Laboratory of Photonic and Electronic Bandgap Materials, Ministry of Education, Harbin Normal University, Harbin, 150025, P. R. China

<sup>b</sup> Center for Aircraft Fire and Emergency, College of Economics and Management, Civil Aviation University of China, Tianjin, 300300, P. R. China

<sup>c</sup> School of Materials Science and Engineering, Institute of New Energy Material Chemistry, Renewable Energy Conversion and Storage Center (ReCast), Nankai University, Nankai University, Tianjin, 300350, P. R. China.

\* To whom correspondence should be addressed. Email: xjz\_hmily@163.com; hjzhang\_ahu@163.com (HZ); zhouzhen@nankai.edu.cn (ZZ).

## Computational Details on Dissolution Potential and Overpotential

To evaluate the stability of Cu<sub>2</sub>B<sub>2</sub> monolayer in strong acidic media, we computed the dissolution potentials ( $U_{dis}$ , in V) of Cu in Cu<sub>2</sub>B<sub>2</sub> monolayer at pH=0, which was defined as:  $U_{dis} = U_{Cu}^0 + [E_{Cu,bulk} - (E_{Cu_2B_2} - E_{d-Cu_2B_2})]/ne$ , where  $U_{Cu}^0$  is the standard dissolution potential of Cu in the bulk form (0.34 V), d-Cu<sub>2</sub>B<sub>2</sub> is the defective Cu<sub>2</sub>B<sub>2</sub> monolayer by dissolving (removing) one Cu to solutions, and  $n$  is the coefficient for the aqueous dissolution reaction:  $Cu + 2H^+ \leftrightarrow Cu^{2+} + H_2$ , namely,  $n$  equals to 2. According to this definition, the  $U_{dis}$  value of Cu in Cu<sub>2</sub>B<sub>2</sub> monolayer is computed to be about 1.76 V.

On the other hand, the overpotential ( $\eta$ ) value was obtained according to the following equation:  $\eta = U_0 - U_L$ , where  $U_0$  is the computed equilibrium potential of COR to C<sub>2</sub>H<sub>5</sub>OH production ( $U_0 = -(\Delta G)/n$ ), and  $U_L$  is the limiting potential of COR on Cu<sub>2</sub>B<sub>2</sub> monolayer (-0.59 V). Since the  $\Delta G$  value for CO reduction to C<sub>2</sub>H<sub>5</sub>OH ( $2CO + 8H^+ + 6e^- \rightarrow C_2H_5OH + H_2O$  in Fig. 5a) was computed to be -1.85 eV, the computed  $U_0$  is  $[-(-1.85)/8] = 0.23$  V]. Thus, the negative overpotential ( $-\eta$ ) of COR on Cu<sub>2</sub>B<sub>2</sub> monolayer is  $-[0.23 \text{ V} - (-0.59 \text{ V})] = -0.82$  V, which is much smaller than the  $U_{dis}$  value of Cu (1.76 V), suggesting that Cu within the Cu<sub>2</sub>B<sub>2</sub> framework can survive under the realistic experimental conditions of CORR, and thus ensuring their excellent long-term stability.

Table S1. The computed free energy changes of each possible elementary step during

| Elementary step                                                                                                    | Free energy change ( $\Delta G$ ) |
|--------------------------------------------------------------------------------------------------------------------|-----------------------------------|
| $\text{CO (g)} \rightarrow \text{*CO}$                                                                             | <b>-0.77</b>                      |
| $\text{*CO} + \text{H}^+ + \text{e}^- \rightarrow \text{*COH}$                                                     | <b>0.59</b>                       |
| $\text{*CO} + \text{H}^+ + \text{e}^- \rightarrow \text{*CHO}$                                                     | 0.71                              |
| $\text{*COH} + \text{H}^+ + \text{e}^- \rightarrow \text{*CHOH}$                                                   | <b>-0.01</b>                      |
| $\text{*COH} + \text{H}^+ + \text{e}^- \rightarrow \text{*C} + \text{H}_2\text{O}$                                 | 1.28                              |
| $\text{*CHOH} + \text{H}^+ + \text{e}^- \rightarrow \text{*CH}_2\text{OH}$                                         | <b>-0.22</b>                      |
| $\text{*CHOH} + \text{H}^+ + \text{e}^- \rightarrow \text{*CH} + \text{H}_2\text{O}$                               | 1.74                              |
| $\text{*CH}_2\text{OH} + \text{H}^+ + \text{e}^- \rightarrow \text{*CH}_2 + \text{H}_2\text{O}$                    | <b>-0.77</b>                      |
| $\text{*CH}_2\text{OH} + \text{H}^+ + \text{e}^- \rightarrow \text{CH}_3\text{OH}^*$                               | 0.04                              |
| $\text{*CH}_2 + \text{CO (g)} + \text{e}^- \rightarrow \text{*CH}_2\text{CO}$                                      | <b>-0.20</b>                      |
| $\text{*CH}_2\text{CO} + \text{H}^+ + \text{e}^- \rightarrow \text{*CH}_2\text{CHO}$                               | <b>-0.59</b>                      |
| $\text{*CH}_2\text{CO} + \text{H}^+ + \text{e}^- \rightarrow \text{*CH}_3\text{CO}$                                | -0.39                             |
| $\text{*CH}_2\text{CO} + \text{H}^+ + \text{e}^- \rightarrow \text{*CH}_2\text{COH}$                               | 0.04                              |
| $\text{*CH}_2\text{CHO} + \text{H}^+ + \text{e}^- \rightarrow \text{*CH}_2\text{CH}_2\text{O}$                     | <b>-0.68</b>                      |
| $\text{*CH}_2\text{CHO} + \text{H}^+ + \text{e}^- \rightarrow \text{*CH}_3\text{CHO}$                              | 0.18                              |
| $\text{*CH}_2\text{CHO} + \text{H}^+ + \text{e}^- \rightarrow \text{*CH}_2\text{CHOH}$                             | 2.29                              |
| $\text{*CH}_2\text{CH}_2\text{O} + \text{H}^+ + \text{e}^- \rightarrow \text{*CH}_3\text{CH}_2\text{O}$            | <b>0.07</b>                       |
| $\text{*CH}_2\text{CH}_2\text{O} + \text{H}^+ + \text{e}^- \rightarrow \text{*CH}_2\text{CH}_3\text{O}$            | 0.54                              |
| $\text{*CH}_2\text{CH}_2\text{O} + \text{H}^+ + \text{e}^- \rightarrow \text{*CH}_2\text{CH}_2\text{OH}$           | 1.06                              |
| $\text{*CH}_3\text{CH}_2\text{O} + \text{H}^+ + \text{e}^- \rightarrow \text{CH}_3\text{CH}_2\text{OH} + \text{*}$ | <b>0.53</b>                       |

the electrochemical reduction of CO to C<sub>2</sub>H<sub>5</sub>OH on Cu<sub>2</sub>B<sub>2</sub> monolayer.

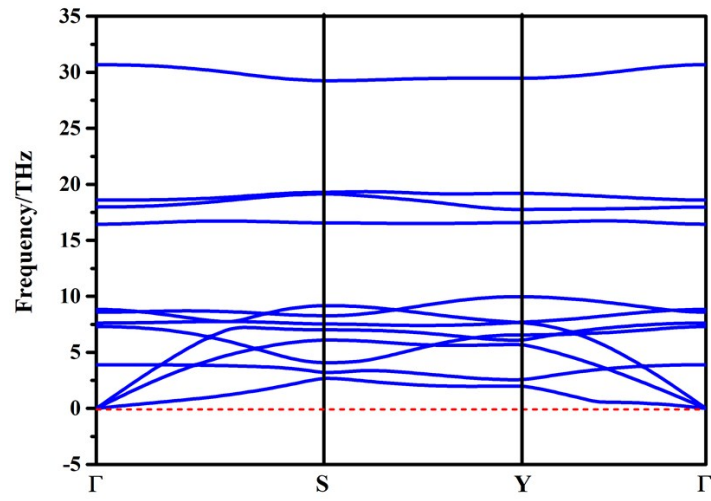

**Figure S1.** The computed phonon dispersions of the predicted Cu<sub>2</sub>B<sub>2</sub> monolayer.

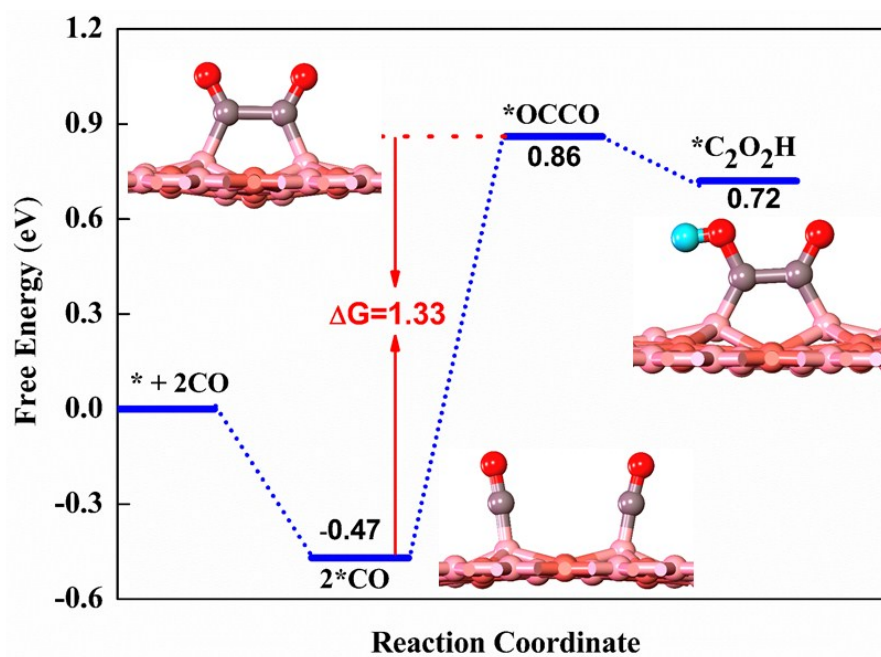

**Figure S2.** The computed free energy profiles for the C–C coupling through the CO direct dimerization on Cu<sub>2</sub>B<sub>2</sub> monolayer and the corresponding structures of the reaction intermediates. Bronze, pink, gray, red, and cyan balls represent Cu, B, C, O, and H atoms, respectively.

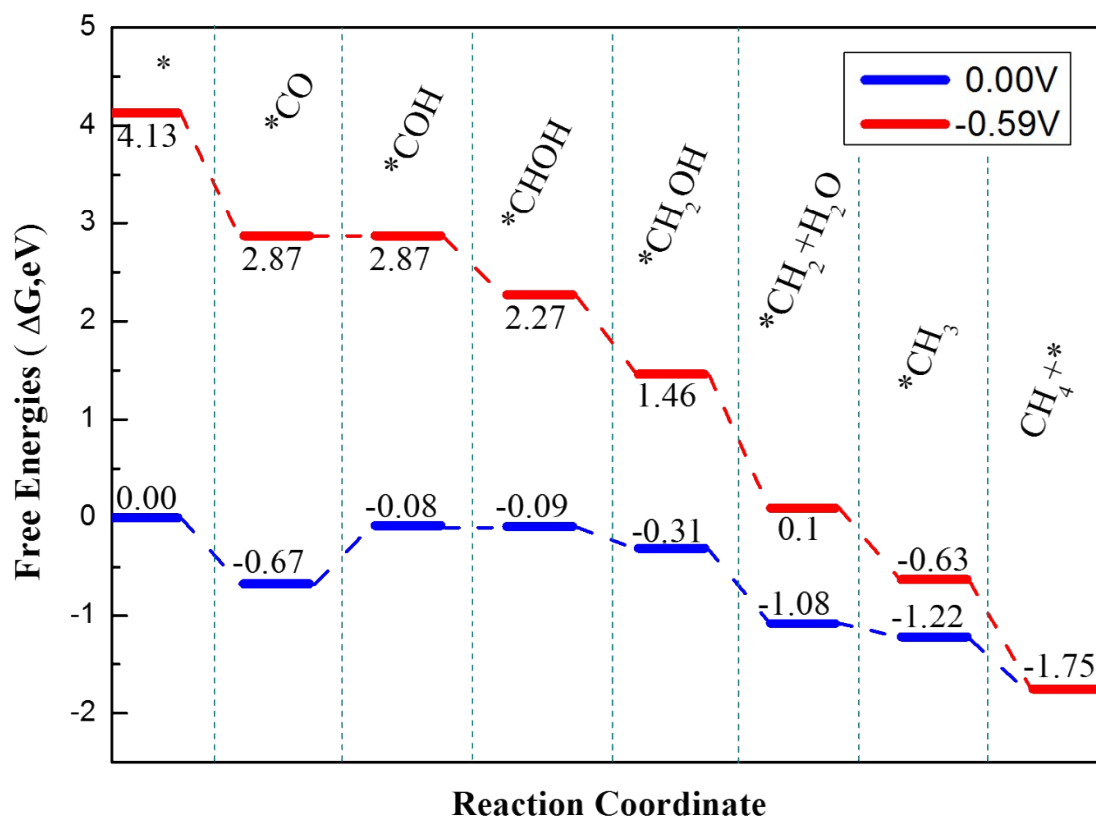

**Figure S3.** Gibbs free energy profiles for CO reduction to CH<sub>4</sub> on Cu<sub>2</sub>B<sub>2</sub> monolayer surface at zero and applied potentials.

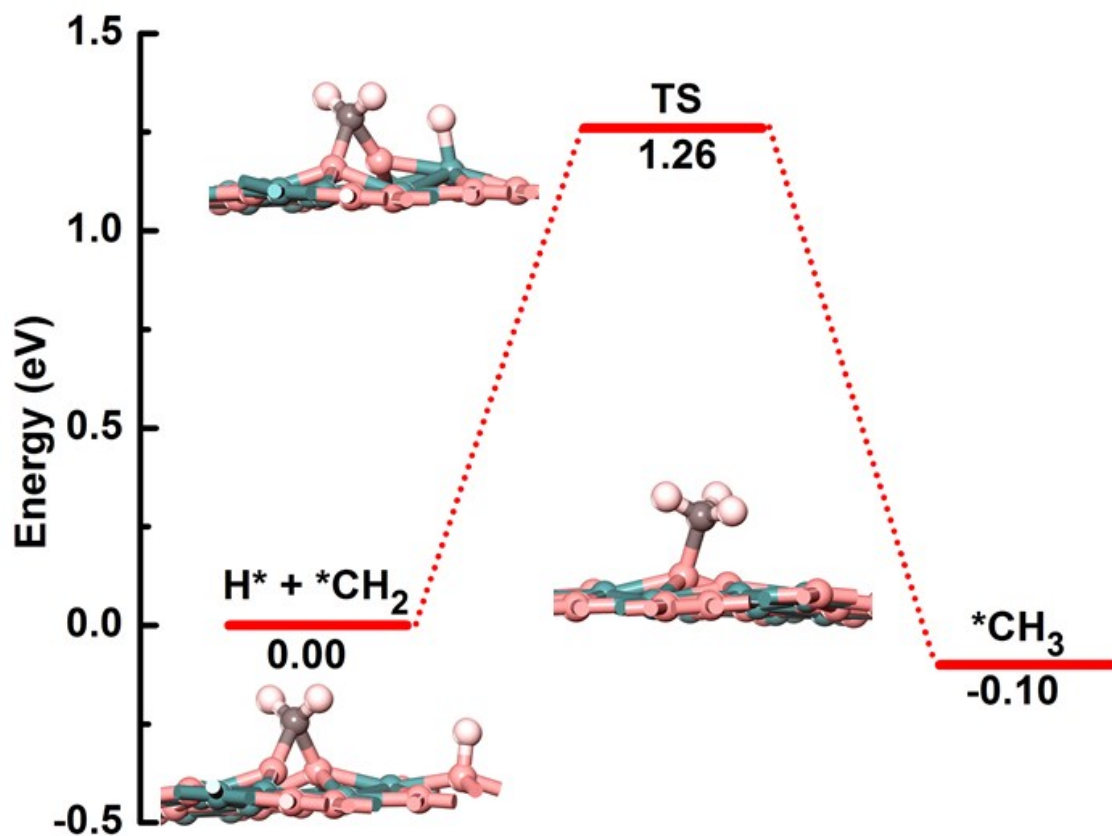

**Figure S4.** The kinetic reaction pathway of the hydrogenation of  $\text{*CH}_2$  species to  $\text{*CH}_3$  species. TS denotes the transition state.

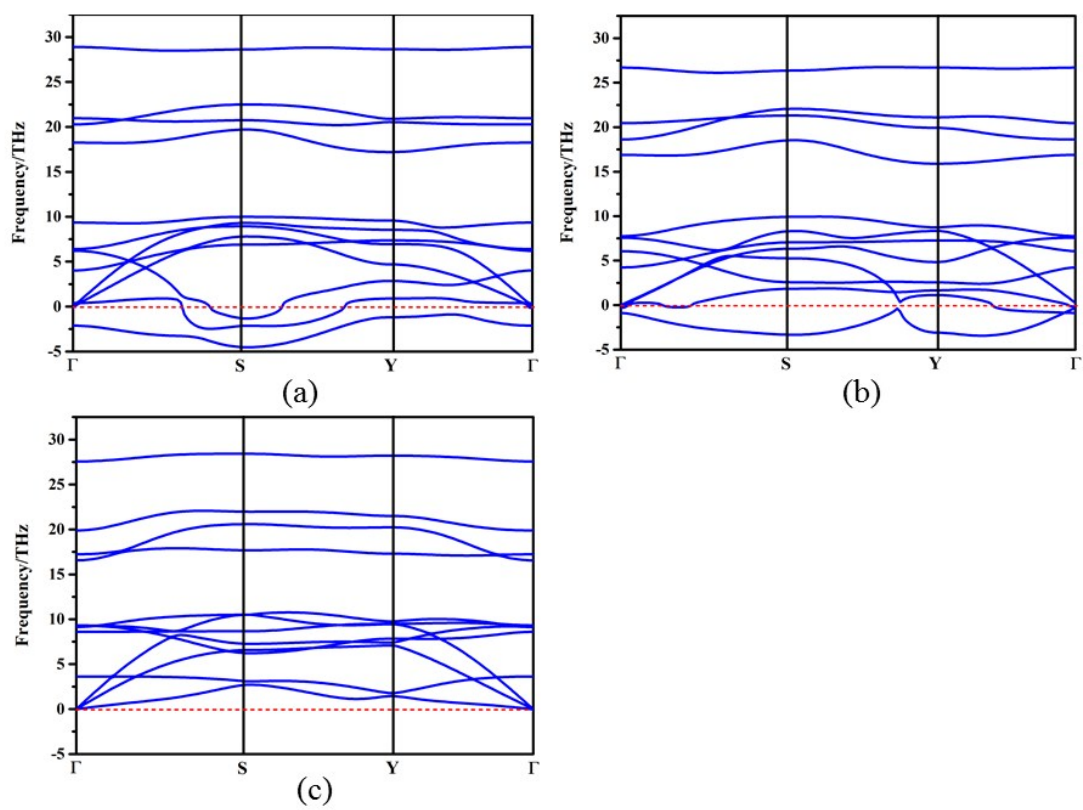

**Figure S5.** The computed phonon dispersion spectra of the predicted (a)  $\text{Fe}_2\text{B}_2$ , (b)  $\text{Co}_2\text{B}_2$ , and (c)  $\text{Ni}_2\text{B}_2$  monolayers.



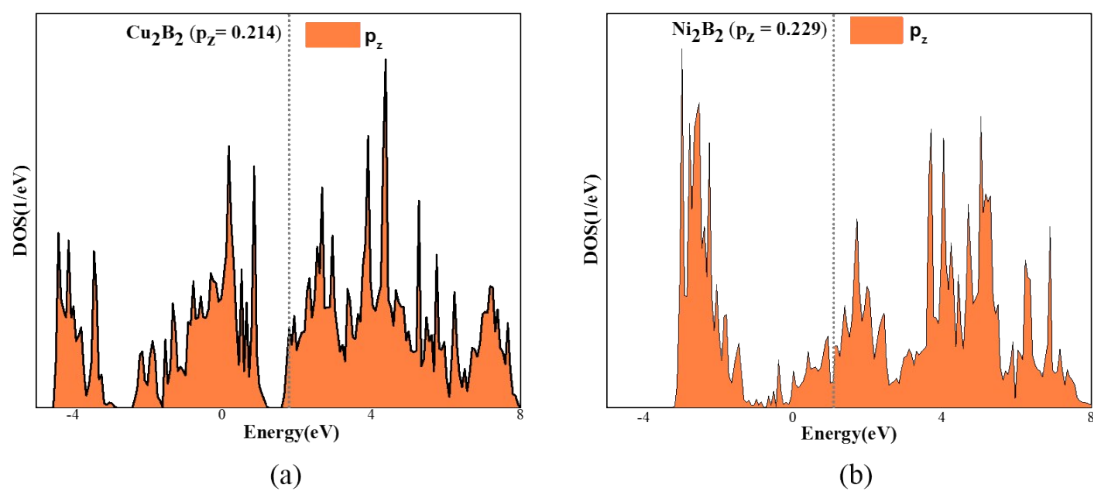

**Figure S6.** Density of states (DOS) of B-2p<sub>z</sub> orbitals for (a) Cu<sub>2</sub>B<sub>2</sub> and (b) Ni<sub>2</sub>B<sub>2</sub> monolayers. The dashed lines indicate the Fermi level.
